1 **Title**

2 **Impact of COVID-19 pandemic on the socioeconomic inequality of health behavior among**

3 **Japanese adolescents: a two-year-repeated cross-sectional survey**

4

5 Akira Kyan<sup>1,2</sup>, Minoru Takakura<sup>2</sup>

6 <sup>1</sup> Graduate School of Human development and environment, Kobe University, Kobe, Japan;

7 <sup>2</sup> Faculty of Medicine, University of the Ryukyus, Nishihara, Japan

8

9 **\* Corresponding author's information**

10 Name: Akira Kyan

11 Institutional addresses: Graduate School of Human development and environment, Kobe University,

12 Kobe, 657-8501 Japan

13 Business telephone number: +81- 78-803-7721

14 E-mail addresses: a-kyan@pony.kobe-u.ac.jp

15

16 **Affiliations and Postal addresses**

17 <sup>1</sup> Graduate School of Human Development and Environment, Kobe University, 3-11 Tsurukabuto,

18 Kobe, Hyogo 867-8501, Japan

19 <sup>2</sup> Faculty of Medicine, University of the Ryukyus, 207 Uehara, Nishihara, Okinawa 903-0215, Japan.

20

21 **Telephone numbers**

22 A.K.: +81-78-803-7721

23 M.T.: +81-98-895-1255

24

25 **Email addresses**

26 A.K.: a-kyan@pony.kobe-u.ac.jp

27 M.T.: minoru@med.u-ryukyu.ac.jp

28

29 **ORCiDs**

30 A.K.: 0000-0002-8134-8687

31 M.T.: 0000-0001-5558-7863

32 **Abstract**

33 **Background:**Although disparities in socioeconomic status in health behaviors have been highlighted  
34 globally, they are not well understood in Japanese adolescents. The purpose of this study was to  
35 clarify the changes in socioeconomic disparities in adolescents' fundamental health behaviors, such  
36 as physical activity, screen time (ST), sleep, breakfast intake, and bowel movement before and  
37 during COVID-19.

38 **Methods:**This was a repeated cross-sectional study which used data from the 2019 and 2021  
39 National Sports-Life Survey of Children and Young in Japan. Data of 766 and 725 participants in  
40 2019 and 2021, respectively, were analyzed. Favorable health behaviors were defined as daily  
41 moderate-to-vigorous physical activity (MVPA) of at least 60 minutes, ST of less than 2 hours, sleep  
42 of 8 to 10 hours, daily breakfast intake, and bowel movement frequency of at least once in every 3  
43 days. We calculated the slope index of inequality (SII) and relative index of inequality (RII) in each  
44 health behavior for equivalent household income levels for assessing absolute and relative economic  
45 inequalities.

46 **Results:**Compliance with MVPA and ST recommendation significantly declined from 20.1% and  
47 23.0% in 2019 to 11.7% and 14.9% in 2021, respectively. The SII and RII increased in MVPA for  
48 income levels, but decreased in daily breakfast in 2019 to 2021. Although the widening and  
49 narrowing of the disparity was inconclusive for ST, it exacerbated for the higher income groups.

50 **Conclusions:**Our study revealed widening of economic disparities in the achievement of  
51 recommended MVPA and narrowing of it in breakfast intake among adolescents before and during

52 COVID-19.

53

54 **Keywords:** Epidemiology; Health inequities; Household income; Physical Activity; Public health

55 **What is already known on this subject**

- 56 • Although disparities in the economic status of the family and neighborhood have been observed  
57 in several fundamental health behaviors among western countries' adolescents, they have not  
58 been well understood in Japan. It has been pointed out that the economic disparities caused by  
59 the COVID-19 pandemic threaten to increase disparities in health and health behaviors.

60

61 **What this study adds**

- 62 • This is the first study to examine the change in socioeconomic inequalities in various health  
63 behavior among Japanese adolescents before and during the COVID-19 pandemic.
- 64 • We found widening of socioeconomic disparities in the achievement of recommended PA
- 65 • We found narrowing of socioeconomic disparities in breakfast intake.

66

67 **How this study might affect research, practice or policy**

- 68 • Continuous monitoring of how this affects health in the short and long term is needed.

69

## 70 **Introduction**

71 The issue of socioeconomic disparities of health in Japan has been pointed out only in the last 20  
72 years, after the period of rapid economic growth. A systematic review of health disparities in Japan  
73 reports that the gradient of disparities is modest in the first decades since the 1990s compared with  
74 western countries [1]. In the last decade, as it worsened, the situation has been recognized as a public  
75 health concern [1]. Since 2013, correcting the situation has been one of the goals of Japan's health  
76 policies [2].

77 In western countries, disparities by the economic status of the family and neighborhood have been  
78 observed in several fundamental health behaviors, such as physical activity (PA) [3], sedentary  
79 behavior (screen time (ST)) [4], sleep behavior [5], bowel movement frequency (constipation) [6],  
80 and food intake [7], among adolescents. In Japan, on the other hand, they are not well understood.  
81 This may be because it has only been a few decades since the health inequalities in Japan were first  
82 called to attention. In relatively recent very few examples of the inequality of health behavior, daily  
83 breakfast intake is higher in the high-income group [8], while socioeconomic disparities in food and  
84 nutrient intake have been restrained owing to serving of school lunches on weekdays in schools [9].  
85 There are no studies on the relationship between socioeconomic status (SES) and exercise in  
86 Japanese adolescents, except for one inconclusive study in a local Japanese journal [10].

87 During the COVID-19 pandemic, the fundamental health behaviors have deteriorated among  
88 adolescents around the world [11,12]. Likewise, national surveys among Japanese adolescents  
89 reported that exercise, including active play, declined significantly, screen time of 2 hours or more

90 per day increased significantly, and daily breakfast intake, adequate sleep of 8-10 hours, and the  
91 frequency of bowel movement remained almost unchanged [13,14]. The COVID-19 pandemic has  
92 not only disrupted healthcare, but also the lifestyle and social and economic activities of people. In  
93 Japan, measures to prevent the spread of the pandemic included policies to restrict people's activities,  
94 such as closure of restaurants and restriction on large-scale events [15]. Thereby, the service industry,  
95 including the restaurants, and tourism industry, experienced a significant drop in sales, and many  
96 businesses were forced into unemployment and bankruptcy [15]. In contrast, the information and  
97 communication industry, including online businesses, saw an increase in sales [15]. Thereby, the  
98 accompanying widening of household income inequality became a concern [16]. The public health  
99 concern associated with it is that this may increase disparities in people's health or health behaviors  
100 [17]. The possibility of increasing disparities in mental well-being [18] and recreational PA [19]  
101 among Japanese adults has been reported recently. Regarding dietary intake among Japanese  
102 adolescents, a recent retrospective study found that meat, fish, eggs, and vegetables intake worsened,  
103 especially in low-income households, during school closure (from 16 April to 6 May, 2020), while it  
104 mended after school lunch restarted [20]. However, no study has been conducted on other health  
105 behaviors in either Japan or the rest of the world [21].

106 Adolescent health behaviors have been documented to not only determine the physical and mental  
107 growth and development and health during adolescence, but also how these are carried over into the  
108 future [22]. It is also a right for all children to have a healthy life [22]. If they are suffering from  
109 inequality because of the home environment, which is beyond their control, they are victims. While

110 some health behaviors, which are affected by the COVID-19 pandemic, should be recovered for  
111 adolescents, understanding how these behaviors vary with household income is important to form  
112 intervention strategies (providing necessary support to those who need it) and policies. Thus, this  
113 study aimed to clarify the trends in socioeconomic disparities in adolescents' health behaviors,  
114 especially the fundamental health behaviors that constituted daily life, such as PA, ST, breakfast  
115 intake frequency, and bowel movement frequency before and during COVID-19.

116

## 117 **Methods**

### 118 **Data source**

119 This study used data from the 2019 and 2021 National Sports-Life Survey of Children and Young  
120 conducted by the Sasakawa Sports Foundation (SSF) [14]. The survey is a nationwide cross-  
121 sectional survey that has been conducted every two years since 2001. From the 2017 survey, the  
122 target age groups were categorized into ages 4-11 and 12-21. The survey mainly measures exercise  
123 and sports participation of children and youth during after-school periods and holidays, and sports  
124 environments as well as health behaviors including sleep time, media usage time, and bowel  
125 movement frequency. Data are collected using self-administered questionnaires from adolescents  
126 and parents/guardians between June and July of each survey year.

127 The study sample of each year was selected using the two-staged stratified random sampling  
128 method from 225 locations (2019: 61 in metro areas, 94 in cities with a population of over 100,000,  
129 50 in cities with a population of less than 100,000, and 20 in towns and villages; 2021: 61 in metro

130 areas, 96 in cities with a population of over 100,000, 50 in cities with a population of less than  
131 100,000, and 18 in towns and villages), which were proportionally distributed from the strata by  
132 district/city size based on the population of the Basic Resident Register as of January 1<sup>st</sup> in the prior  
133 year of each survey year. The study area established at the time of the census in 2015 was used as the  
134 primary sampling unit at the time of the survey. The target sample size allocated to each location was  
135 10 to 19. Survey points were extracted by the probability proportional sampling method, using the  
136 following formula to calculate the sampling interval for strata in which two or more survey points  
137 were assigned.

138 *Total number of people aged 4 to 21 years in the study area in the strata / Number of survey sites*  
139 *calculated in strata*

140 A total of 3,000 individuals participated in the survey. Detailed information on the survey methods  
141 can be found on the SSF website [14].

142 In this study, we used data from the surveys of young people aged 12 to 21 in 2019 and 2021, as all  
143 variables of interest were available. The number of responses for 2019 and 2021 were 1,675  
144 (response rate 55.8%) and 1,663 (response rate 55.4%), respectively. The analysis included 12- to  
145 18-year-olds, excluding 18-year-olds who were not attending high school. In the Japanese  
146 educational system, most students enrolled in high school are 15- to 18-year-olds. Of these, most 17-  
147 and 18-year-olds are enrolled in the third grade of high school and share school routines. This was  
148 the reason for including 18-year-olds attending high school in the analysis, while the age categories  
149 for the analysis of PA, ST, and sleep recommendations were up to age 17. After excluding

150 individuals with missing variables of interest, data from 766 participants (359 boys and 407 girls) in  
151 2019 and 725 participants (365 boys and 360 girls) in 2021 were used for analysis. Ethical approval  
152 was not required, as this study was a secondary analysis conducted using public datasets from the  
153 SSF that did not include identifiable personal information.

154

## 155 **Measures**

### 156 *Physical activity*

157 PA was measured using the Japanese version of the Health Behaviour in School-aged Children  
158 survey (HBSC) questionnaire [23]. The HBSC questionnaire is widely used globally as the basis of  
159 moderate-to-vigorous PA (MVPA) surveillance of adolescents [24]. In the questionnaire, PA referred  
160 to any activity that increased the heart rate and made an individual feel out of breath for some time.  
161 PA can include sports, school activities, playing with friends, or walking to school. Examples of PA  
162 include running, brisk walking, rollerblading, biking, dancing, skateboarding, swimming, playing  
163 soccer, basketball, football, etc., and surfing. The question item was as follows: ‘Over the past 7  
164 days, on how many days were you physically active for a total of at least 60 minutes per day?’.  
165 Participants were dichotomized into either active or inactive based on whether they achieved seven  
166 days per week of 60 minutes MVPA, according to the World Health Organization (WHO) guidelines  
167 on PA and sedentary behavior [25].

168

### 169 *Screen time*

170 ST was assessed by asking about recreational TV/DVD viewing time and  
171 computer/game/smartphone usage on weekdays and weekends separately. These questions were  
172 formulated as follows: 'For how many hours do you watch TV or DVD or use computer, video  
173 games (including TV, computer, and cellular device games, etc.), or smartphone per day outside of  
174 school and/or work?'. Possible answers to the question were 'less than half-hour/day,' 'half-hour to 1  
175 h/day,' '1–2 h/day,' '2–3 h/day,' '3–4 h/day,' '4–5 h/day,' 'more than 5 h/day,' and 'I don't know'.  
176 The answer categories were recorded in minutes using the midpoint method. The 'I don't know'  
177 option was deemed a missing case. Average minutes of daily ST were weighted by weekdays and  
178 weekends using the following formula:

$$179 \quad [(minutes\ of\ ST\ on\ weekdays \times 5) + (minutes\ of\ ST\ on\ weekends \times 2)] / 7.$$

180 We then categorized the participants based on the cut-off of 2 h of recreational ST [25].

181

### 182 *Sleep duration*

183 Sleep duration was assessed by questioning on bedtime and awakening hours on weekdays and  
184 weekends separately. Participants were asked to report the times they typically went to sleep at night  
185 and woke up in the morning on weekdays and weekends. Sleep duration was calculated by  
186 subtracting wake-up time from bedtime.

187 Average minutes of daily sleep were weighted by weekdays and weekends using the following  
188 formula:

$$189 \quad [(sleep\ duration\ on\ weekdays \times 5) + (sleep\ duration\ on\ weekends \times 2)] / 7.$$

190 The participants were grouped based on whether they had a sleep duration that was within the  
191 range (8.0–10.0 h/night) recommended by the National Sleep Foundation [26].

192

### 193 *Breakfast*

194 Breakfast frequency was determined by asking the question ‘How often do you have breakfast per  
195 week?’; the possible responses were ‘almost every day’, ‘eating 4-5 days per week’, ‘eating 2-3 days  
196 per week’, and ‘very few’. Participants were dichotomized into almost every day or others based on  
197 the recommendation of the Ministry of Agriculture, Forestry and Fisheries, Japan [27].

198

### 199 *Bowel movement frequency*

200 Bowel movement frequency was determined by asking the question ‘How often do you have  
201 bowel movement?’; the possible responses were ‘almost every day’, ‘once per two days’, ‘once per  
202 three days’, ‘less than once per three days’, and ‘irregularly’. We dichotomized participants into two  
203 groups: ‘almost every day to once every three days’ and ‘less than once every three days and  
204 irregular’, with reference to the definition of constipation [6]. While the definition of constipation  
205 ranges from self-reported constipation to clinical criteria regarding frequency of bowel movements  
206 and symptoms [6], one of the symptoms included in the Rome IV criteria is ‘two or fewer  
207 defecations in the toilet per week [6].

208

### 209 *Household Income*

210 The parents/guardians of the participants were asked about their annual pre-tax household income  
211 using 11 options ranging from ‘no income’ to ‘10 million yen or more’. The ‘I don't know’ option  
212 was deemed a missing case. The midpoint of each option was substituted for the household income.  
213 The equivalent household income was calculated by dividing household income by the square root  
214 of the number of members in the household [28]. Subsequently, the equivalent household income  
215 was categorized based on one-half of the median equivalent household income as a cut-off point:  
216 ‘less than 1.375 million yen’, ‘1.375 to less than 2.75 million yen’, and ‘2.75 million yen or  
217 more’[29]. One million yen was roughly ten thousand US dollars at the time of the survey.

218

#### 219 *Confounding factors*

220 Place of residence, family structure, sex, age, sports participation, self-rated health, and preference  
221 of PA were used as covariates, and were considered as potential confounders [3,30]. The place of  
222 residence was categorized into two groups based on the population of the cities. Family structure  
223 was assessed using information regarding the people living in the home, coded as ‘living with both  
224 parents’ or ‘other.’ Sports participation was assessed by asking whether the participants were  
225 involved in extra-curricular exercise activity in school, sports clubs in local community, and private.  
226 Self-rated health was dichotomized into ‘good’ and ‘poor’. Preference for PA was dichotomized into  
227 ‘like’ and ‘dislike’.

228

#### 229 **Statistical analysis**

230 Initially, the percentage of compliance with health behavior recommendation was estimated by  
231 each income level and each survey year. Cochran-Armitage test for trend was used to assess time  
232 trends in the percentage of compliance with each recommendation of health behavior and prevalence  
233 of constipation over time by each income level. Fisher's exact test was performed to evaluate  
234 differences in compliance with each recommendation of health behavior and prevalence of  
235 constipation among different categories for each income level by each survey year. Next,  
236 socioeconomic inequalities in health behavior between low- and high-income groups were assessed  
237 by absolute and relative measures. Both absolute and relative measures were estimated with 95%  
238 confidence intervals (CIs) for income levels in each survey year. For the absolute measures, the  
239 slope index of inequality (SII) [31] was calculated using generalized linear models with binomial  
240 distribution and identity link function. The coefficient yielded an estimate of the absolute inequality.  
241 When this binomial model failed to converge, a generalized linear model with normal distribution  
242 and identity link function was used [32]. For the relative measures, the relative index of inequality  
243 (RII) [31] was calculated using generalized linear models with binomial distribution and log link  
244 function. The exponentiated coefficient yielded an estimate of the relative inequality. The SII and  
245 RII were estimated using ridit score for income levels as an independent variable. The SII and RII  
246 were summary measures of inequality as the changes in health behavior between the bottom and top  
247 points in the income hierarchy while accounting for the cumulative distribution in each income level  
248 [33]. Time trends of absolute and relative measures were assessed by the inclusion of the interaction  
249 term between income levels (ridit score for the SII and RII) and survey year [33]. In the model,

250 survey year was treated as a continuous variable coded as 1 for 2019 and 2 for 2021 [33]. Wald test  
251 was used to test if the interaction term was statistically significant. Finally, these models were  
252 adjusted for confounding factors, such as place of residence, family structure, sex, age, sports  
253 participation, self-rated health, and preference of PA. To explore the association between the  
254 outcomes, when each health behavior was considered in the dependent variable as an outcome, other  
255 health behaviors were included in the independent variables.

256

## 257 **Results**

258 Table 1 shows the distribution of study participants by sociodemographic characteristics and  
259 survey years. There were significant relationships between survey year and MVPA and ST ( $P < 0.05$ ).

260 The number and percentage of missing each variable were shown in the e-Table (appendix). The  
261 missing percentages for each variable were similar in both surveys. Household income was missing  
262 by approximately 22% in each survey. This is because the "I don't know" option was treated as a  
263 missing value.

264 Table 2 shows the prevalence in compliance with each health behavior recommendation by  
265 income levels and survey years. Overall, although the compliance with PA and ST recommendation  
266 significantly declined from 20.1% and 23.0% in 2019 to 11.7% and 14.9% in 2021, respectively, the  
267 compliance with sleep and breakfast frequency recommendation and constipation prevalence  
268 remained unchanged between 2019 (63.2%, 83.6%, and 10.1%, respectively) and 2021 (64.7%,  
269 83.3%, and 10.5%, respectively). While declining trends in PA were observed for all income levels,

270 declining trends in ST were observed for only high-income level. Regarding breakfast consumption,  
271 no overall trend of change was observed between 2019 and 2021, but a declining trend was observed  
272 only at the high-income level, although it was not statistically significant. Table 2 also shows the  
273 results of Fisher's exact test. A clear difference between 2019 and 2021 emerged in breakfast intake:  
274 the percentage of breakfast intake was lower in the low-income group and higher in the highest-  
275 income group in 2019 ( $P < 0.001$ ), but the differences between the groups obscured in 2021 ( $P =$   
276  $0.151$ ). A similar trend was observed for ST, although it was not statistically significant ( $P$  in 2019  
277 and 2021 were  $0.097$  and  $0.863$ , respectively). On the other hand, PA showed differences by income  
278 levels in 2021, although it was not statistically significant ( $P = 0.063$ ), but not in 2019 ( $P = 0.907$ ).  
279 These differences by socioeconomic levels between the study periods were not found in compliance  
280 with sleep duration ( $P$  in 2019 =  $0.916$ ;  $P$  in 2021 =  $0.356$ ) and bowel frequency ( $P$  in 2019 =  $0.503$ ;  
281  $P$  in 2021 =  $0.265$ ).

282 Table 3 shows the SII and RII in each health behavior for the income levels by survey years.  
283 Significant increase and decrease trends of disparities were shown in the compliance of MVPA and  
284 daily breakfast intake. The SII in MVPA increased from  $-2.37\%$  (95% CI  $13.62- 8.87$ ) in 2019 to  
285  $11.2\%$  (95% CI  $2.90- 19.50$ ) in 2021. Although it was not statistically significant in the crude model  
286 ( $P$  for trends =  $0.057$ ), the adjusted model showed significant increase trends ( $P$  for trends =  $0.032$ ).  
287 The RII in MVPA increased from  $0.86$  (95% CI  $0.43- 1.73$ ) in 2019 to  $3.03$  (95% CI  $1.16- 7.93$ ) in  
288 2021 ( $P$  for trends =  $0.038$ ). In contrast, the SII in breakfast intake decreased from  $20.22\%$  (95% CI  
289  $9.4- 31.04$ ) in 2019 to  $1.35\%$  (95% CI  $-9.87- 12.57$ ) in 2021 ( $P$  for trends =  $0.018$ ). The RII also

290 decreased from 4.34 (95% CI 2.05– 9.18) in 2019 to 1.11 (95% CI 0.5–2.47) in 2021 (P for trends =  
291 0.015). The SII in ST decreased from 20.72% (95% CI 7.71– 33.72) in 2019 to 4.74% (95% CI -  
292 7.97– 17.45) in 2021, but it was not statistically significant (P for trends = 0.085). Similarly, for RII,  
293 the disparity decreased numerically but was not statistically significant. For sleep duration and  
294 bowel movement, no disparities or increase and decrease trends were observed for the survey years.  
295 Except the SII in PA, all adjusted models showed almost the same results as the crude models.

296

## 297 **Discussion**

298 This is the first study to examine the time trend in socioeconomic inequalities in various health  
299 behaviors among the Japanese adolescents before and during the COVID-19 pandemic. We found  
300 widening of socioeconomic disparities in the achievement of recommended PA and narrowing of  
301 socioeconomic disparities in breakfast intake among adolescents. For MVPA particularly, while all  
302 income groups showed deterioration during the COVID-19 pandemic, the trend was more prominent  
303 in the lowest-income groups. Breakfast intake frequency showed an improving trend among lower  
304 income groups, while it was worsening among higher-income groups. For ST, the widening and  
305 narrowing of the disparity was inconclusive. However, it exacerbated in the higher income groups.  
306 Sleep duration and bowel movement frequency did not change from pre-COVID-19 time to the  
307 present, and no socioeconomic disparities were observed. The percentage of the present study  
308 participants achieving the recommended sleep duration was poor at approximately 35%, while other  
309 countries achieved roughly 65% [34]. The prevalence of constipation at about 10% was not

310 relatively high [6].

311 The association between SES and PA observed in other countries [3] has not been reported in  
312 Japan [10]. This was probably due to having extracurricular activities as a social system in Japan that  
313 allowed many adolescents to participate in sports without spending money. Japan has a system of  
314 extracurricular activities in which teachers are engaged in sports coaching from junior high school  
315 through high school [35]. In most cases, the cost of participation in extracurricular activities is small,  
316 with minimal expenses for the essential equipment. The course of study stipulate a policy for  
317 extracurricular activities [36] and almost all schools have it. This is a unique initiative worldwide  
318 [35]. According to national comprehensive survey data, as of 2019, the percentage of second-year  
319 middle school students enrolled in sports/exercise programs was as high as 66.5% [13], which meant  
320 that it played an important role as an equitable opportunity for PA for the Japanese adolescents. The  
321 decline in PA among Japanese adolescents during the COVID-19 pandemic was probably the result  
322 of the prohibition of that activity due to the pandemic. The widening socioeconomic disparity in PA  
323 may be due, in part, to the dependency of accessibility of sports activities on the SES of the family.  
324 The local government took measures, such as banning extracurricular activities, at the municipal  
325 level to prevent the spread of COVID-19, and the decision to exercise was up to the individuals.  
326 Meanwhile, paid sports organizations continued to provide certain services, such as online lectures.  
327 The association between paid sports activities and household income has been pointed out before the  
328 pandemic [37]. That is, it can be presumed that a larger proportion of adolescents from families with  
329 sufficient household income were engaged in paid sports and benefited from them, while a larger

330 proportion of those from low-income families, who were not engaged in paid sports, were inactive.

331 Further research is needed to clarify these details.

332 Socioeconomic disparities in compliance with breakfast intake recommendation have narrowed:

333 the percentage of lower-income groups has improved, while that of higher-income groups has

334 declined. The reason for the decrease in the percentage of higher income groups is not clear, but it is

335 possible that the overall increase in people's health awareness due to the pandemic [38] has led to an

336 improvement in the percentage of low-income groups consuming breakfast. Assuming that the

337 acquisition of knowledge about diet causes behavioral change [39], the change to have regular

338 breakfast, irrespective of its content, may be easier than changing other health behaviors. This is

339 because food resources are also abundant in Japan.

340 A meta-analysis in high-income Western countries found that young people from lower

341 socioeconomic backgrounds have higher levels of ST compared with those from higher

342 socioeconomic backgrounds [4]. According to our results, in 2019, before the COVID-19 pandemic,

343 the trend in Japan was similar to that in other countries. It can be seen that ST has also worsened for

344 higher income groups due to the pandemic. Although the economic disparity can be interpreted to

345 have been eliminated, the overall deterioration is an urgent public health issue. It is plausible to

346 assume that the lifestyles of the higher income groups are changing since the restrictions on going

347 out have led people, at all income levels, to spend more time at home. As mentioned above, higher

348 income groups are more likely to participate in paid private tutoring and sports activities [37]. It is

349 assumed that adolescents from higher-income families had more ST at home due to the COVID-19

350 pandemic. Similar changes may be occurring around the world, but no research has yet elucidated it,  
351 except for our study. It should be urgently verified.

352

### 353 **Limitations**

354 This study had some limitations. Because this is not a longitudinal study, individual trajectory is  
355 unknown. Although the sampling method of the present study is appropriate to ensure the  
356 representativeness of the data, eligible samples included in the analysis were 45.7% and 43.6% of all  
357 respondents in 2019 and 2021, respectively. However, the proportion of population in each  
358 district/city based on their sizes was similar to that of the nation as a whole. Therefore, the  
359 representativeness of the data would not deviate considerably. Another limitation is that all data are  
360 from self-reported questionnaires, which cannot deny the possibility of including biases such as  
361 social desirability. However, the question items used in this study were almost identical to those used  
362 in large international or national surveys. For example, PA, ST, sleep, and breakfast frequency were  
363 similar to those used in the HBSC [24] and Japanese comprehensive surveys [13]. Thus, these items  
364 have sufficient validity as questionnaire to capture the health behaviors of adolescents. The number  
365 of the missing value of income was relatively large, but the pattern of missing values was similar in  
366 each survey year. This may not be a critical issue in discussing trends in socioeconomic disparities.  
367 It also has been pointed out that disparities in these health behaviors have been recognized for other  
368 SES indicators, such as parental education level, jobs, and psychosocial deprivation. Impacts to  
369 health behaviors may vary by SES indicators [3]. Future studies need to examine disparities in other

370 SES indicators to identify needs for support. Although a number of factors related to each health  
371 behavior were taken into account, dietary intake related to bowel movement frequency was only  
372 taken into account for breakfast intake frequency due to a lack of data. No socioeconomic disparities  
373 in bowel movement frequency have been detected previously in Japan; our results are in line with  
374 previous studies [30]. Given that bowel movement frequency is related to dietary intake, school  
375 lunches may also contribute to reducing the socioeconomic inequality in bowel movement. To  
376 clarify this, future studies need to examine dietary intake and bowel movement simultaneously.

377

## 378 **Conclusion**

379 In conclusion, our study revealed that economic disparities in the achievement of recommended  
380 PA widened, while it narrowed for breakfast intake among adolescents before and during COVID-19.  
381 The fact that we found socioeconomic disparities that were insignificant before the pandemic  
382 confronted us with the need for urgent supports and medium- and long-term monitoring. Possible  
383 supports include financial assistance to low-income populations, interventions that encourage more  
384 effective health behavior change among them, etc. Because of the relatively mild restrictions on  
385 behavior in Japan compared to other countries (e.g. no lockdowns are imposed) [12], a severer  
386 situation is feared in other countries. Indeed, a recent ecological study among Scottish adolescents  
387 reported on the cautionary on a possible widening socioeconomic inequality in PA and ST [40].  
388 Further individual-level research is necessary to verify this.

389

390 **Author statements**

391 *Acknowledgements*

392 We would like to thank Editage ([www.editage.com](http://www.editage.com)) for English language editing.

393

394 *Ethical approval*

395 Ethical approval was not required, as this study was a secondary analysis conducted using public

396 datasets from the SSF that did not include identifiable personal information.

397

398 *Funding*

399 This study was supported by the Grant-in-Aid for Scientific Research (JSPS KAKENHI Grant

400 Number 20K10473 and 20K13966) from the Japan Society for the Promotion of Science.

401

402 *Competing interests*

403 The authors declare that they have no competing interests.

404

405 *Authors contribution*

406 All authors contributed to the concept or design of the study and the acquisition, analysis, or

407 interpretation of data for the work. A.K. drafted the manuscript. M.T. critically revised the

408 manuscript. All authors gave final approval and agreed to be accountable for all aspects of work,

409 thus ensuring integrity and accuracy.

410 **References**

- 411 1 Ikeda N, Saito E, Kondo N, *et al.* What has made the population of Japan healthy? *Lancet*  
412 2011;**378**:1094–105. doi:10.1016/S0140-6736(11)61055-6
- 413 2 Ministry of Health L and W. Healthy Japan 21 (the second term).  
414 2018.<https://www.nibiohn.go.jp/eiken/kenkounippon21/en/> (accessed 23 Jun 2022).
- 415 3 O’Donoghue G, Kennedy A, Puggina A, *et al.* Socio-economic determinants of physical activity  
416 across the life course: a ‘DEterminants of DIet and Physical ACTivity’ (DEDIPAC) umbrella  
417 literature review. *PLoS One* 2018;**13**:e0190737. doi:10.1371/JOURNAL.PONE.0190737
- 418 4 Mielke GI, Brown WJ, Nunes BP, *et al.* Socioeconomic Correlates of Sedentary Behavior in  
419 Adolescents: Systematic Review and Meta-Analysis. *Sport Med* 2017;**47**:61–75.  
420 doi:10.1007/S40279-016-0555-4/FIGURES/5
- 421 5 Sosso FE, Khoury T. Socioeconomic status and sleep disturbances among pediatric population: a  
422 continental systematic review of empirical research. *Sleep Sci* 2021;**14**:245. doi:10.5935/1984-  
423 0063.20200082
- 424 6 Mugie SM, Benninga MA, Di Lorenzo C. Epidemiology of constipation in children and adults: A  
425 systematic review. *Best Pract Res Clin Gastroenterol* 2011;**25**:3–18.  
426 doi:10.1016/j.bpg.2010.12.010
- 427 7 Cislak A, Safron M, Pratt M, *et al.* Family-related predictors of body weight and weight-related  
428 behaviours among children and adolescents: a systematic umbrella review. *Child Care Health*  
429 *Dev* 2012;**38**:321–31. doi:10.1111/J.1365-2214.2011.01285.X

- 430 8 Okamoto S. Parental socioeconomic status and adolescent health in Japan. *Sci Rep*  
431 2021;**11**:12089. doi:10.1038/s41598-021-91715-0
- 432 9 Murayama N, Ishida H, Yamamoto T, *et al.* Household income is associated with food and  
433 nutrient intake in Japanese schoolchildren, especially on days without school lunch. *Public*  
434 *Health Nutr* 2017;**20**:2946–58. doi:10.1017/S1368980017001100
- 435 10 Yamakita M, Sato M, Ando D, *et al.* Associations between parent’s educational levels and  
436 children’s time spent in exercise. *Res Exerc Epidemiol* 2017;**19**:36–43. doi:10.24804/ree.19.36
- 437 11 Farello G, Di Lucia A, Fioravanti B, *et al.* Analysis of the impact of COVID-19 pandemic on  
438 functional gastrointestinal disorders among paediatric population. *Eur Rev Med Pharmacol Sci*  
439 2021;**25**:5836–42. doi:10.26355/EURREV\_202109\_26802
- 440 12 Kharel M, Sakamoto JL, Carandang RR, *et al.* Impact of COVID-19 pandemic lockdown on  
441 movement behaviours of children and adolescents: a systematic review. *BMJ Glob Heal*  
442 2022;**7**:e007190. doi:10.1136/BMJGH-2021-007190
- 443 13 Japan sports agency. National survey of the physical strength, exercise ability and exercise habits.  
444 2021.[https://www.mext.go.jp/sports/b\\_menu/toukei/kodomo/zencyo/1368222.htm](https://www.mext.go.jp/sports/b_menu/toukei/kodomo/zencyo/1368222.htm) (accessed 24  
445 Jun 2022).
- 446 14 Sasakawa Sports Foundation. Publications. 2021.<https://www.ssf.or.jp/en/publications/> (accessed  
447 21 Jul 2022).
- 448 15 Statistics Bureau of Japan. Summary of the Results of Monthly Survey on Service Industries.  
449 2018.<https://www.stat.go.jp/english/data/mssi/kekka/index.html> (accessed 22 Sep 2021).

- 450 16 Cabinet office. 2021 Analysis of the Survey of Children's Living Conditions Report.  
451 2022.<https://www8.cao.go.jp/kodomonohinkon/chousa/r03/pdf-index.html> (accessed 23 Jun  
452 2022).
- 453 17 Ahmed F, Ahmed N, Pissarides C, *et al.* Why inequality could spread COVID-19. *Lancet Public*  
454 *Heal* 2020;**5**:e240. doi:10.1016/S2468-2667(20)30085-2
- 455 18 Kanbayashi H, Hommerich C, Sudo N. Impact of COVID-19 Pandemic on Household Income  
456 and Mental Well-Being: *Sociol Theory Methods* 2021;**36**:259–77. doi:10.11218/ojjams.36.259
- 457 19 Kyan A, Takakura M. Socio-economic inequalities in physical activity among Japanese adults  
458 during the COVID-19 pandemic. *Public Health* 2022;**207**:7–13. doi:10.1016/j.puhe.2022.03.006
- 459 20 Horikawa C, Murayama N, Kojima Y, *et al.* Changes in Selected Food Groups Consumption and  
460 Quality of Meals in Japanese School Children during the COVID-19 Pandemic. *Nutrients*  
461 2021;**13**:2743. doi:10.3390/nu13082743
- 462 21 López-Bueno R, López-Sánchez GF, Casajús JA, *et al.* Potential health-related behaviors for pre-  
463 school and school-aged children during COVID-19 lockdown: A narrative review. *Prev Med*  
464 *(Baltim)* 2021;**143**:106349. doi:10.1016/j.yjmed.2020.106349
- 465 22 Patton GC, Sawyer SM, Santelli JS, *et al.* Our future: a Lancet commission on adolescent health  
466 and wellbeing. *Lancet* 2016;**387**:2423–78. doi:10.1016/S0140-6736(16)00579-1
- 467 23 Tanaka C, Kyan A, Takakura M, *et al.* Validation of the Physical Activity Questions in the World  
468 Health Organization Health Behavior in School-Aged Children Survey Using Accelerometer Data  
469 in Japanese Children and Adolescents. *J Phys Act Heal* 2021;**18**:151–6. doi:10.1123/jpah.2019-

- 470 0671
- 471 24 Inchley J, Currie D, Cosma A, *et al.* Health Behaviour in School-aged Children (HBSC) study  
472 protocol: background, methodology and mandatory items for the 2017/18 survey. 2018.
- 473 25 World Health Organization. WHO guidelines on physical activity and sedentary behaviour.  
474 2020.<https://www.who.int/publications/i/item/9789240015128> (accessed 10 Sep 2021).
- 475 26 Hirshkowitz M, Whiton K, Albert SM, *et al.* National Sleep Foundation’s sleep time duration  
476 recommendations: methodology and results summary. 2015. doi:10.1016/j.sleh.2014.12.010
- 477 27 Ministry of Agriculture F and F. What Are the Benefits of Shokuiku (Food and Nutrition  
478 Education)? 2018.<https://www.maff.go.jp/j/syokuiku/evidence/index.html> (accessed 9 Jul 2022).
- 479 28 OECD. What are equivalence scales? 2011.[http://www.oecd.org/els/soc/OECD-Note-](http://www.oecd.org/els/soc/OECD-Note-EquivalenceScales.pdf)  
480 [EquivalenceScales.pdf](http://www.oecd.org/els/soc/OECD-Note-EquivalenceScales.pdf) (accessed 10 Sep 2021).
- 481 29 Keppel K, Pamuk E, Lynch J, *et al.* Methodological Issues in Measuring Health Disparities. *Vital*  
482 *Health Stat* 2005;:1–16./pmc/articles/PMC3681823/ (accessed 10 Sep 2021).
- 483 30 Yamada M, Sekine M, Tatsuse T. Psychological Stress, Family Environment, and Constipation in  
484 Japanese Children: The Toyama Birth Cohort Study. *J Epidemiol* 2019;29:220–6.  
485 doi:10.2188/jea.JE20180016
- 486 31 Mackenbach JP, Kunst AE. Measuring the magnitude of socio-economic inequalities in health:  
487 An overview of available measures illustrated with two examples from Europe. *Soc Sci Med*  
488 1997;44:757–71. doi:10.1016/S0277-9536(96)00073-1
- 489 32 Naimi AI, Whitcomb BW. Estimating Risk Ratios and Risk Differences Using Regression. *Am J*

- 490 *Epidemiol* 2020;**189**:508–10. doi:10.1093/aje/kwaa044
- 491 33 Wachtler B, Hoebel J, Lampert T. Trends in socioeconomic inequalities in self-rated health in  
492 Germany: a time-trend analysis of repeated cross-sectional health surveys between 2003 and 2012.  
493 *BMJ Open* 2019;**9**:e030216. doi:10.1136/bmjopen-2019-030216
- 494 34 Rollo S, Antsygina O, Tremblay MS. The whole day matters: Understanding 24-hour movement  
495 guideline adherence and relationships with health indicators across the lifespan. *J Sport Heal Sci*  
496 2020;**9**:493–510. doi:10.1016/j.jshs.2020.07.004
- 497 35 Nakazawa A. Seeing sports as educational activities: a postwar history of extracurricular sports  
498 activities in Japan. *Hitotsubashi J Soc Stud* 2014;**45**:1–14.
- 499 36 Japan Sports Agency. Course of Study.  
500 2018.[https://www.mext.go.jp/sports/b\\_menu/sports/mcatetop04/list/1398875.htm](https://www.mext.go.jp/sports/b_menu/sports/mcatetop04/list/1398875.htm) (accessed 11  
501 Jul 2022).
- 502 37 Benesse Education Research Institute. Third Annual Survey of Out-of-School Educational  
503 Activities 2017. 2017.<https://berd.benesse.jp/shotouchutou/research/detail1.php?id=5210>  
504 (accessed 11 Jul 2022).
- 505 38 Japan Sports Agency. Survey research on the public's participation in sports, changes in  
506 awareness, and health status due to the outbreak of new coronavirus infection.  
507 2019.[https://www.mext.go.jp/sports/b\\_menu/sports/mcatetop01/list/detail/jsa\\_00003.html](https://www.mext.go.jp/sports/b_menu/sports/mcatetop01/list/detail/jsa_00003.html)  
508 (accessed 11 Jul 2022).
- 509 39 Asakura K, Todoriki H, Sasaki S. Relationship between nutrition knowledge and dietary intake

510 among primary school children in Japan: Combined effect of children's and their guardians'

511 knowledge. *J Epidemiol* 2017;**27**:483–91. doi:10.1016/J.JE.2016.09.014

512 40 Bardid F, Tomaz SA, Johnstone A, *et al.* Results from Scotland's 2021 report card on physical

513 activity and Health for children and youth: Grades, secular trends, and socio-economic

514 inequalities. *J Exerc Sci Fit* Published Online First: 19 July 2022. doi:10.1016/j.jesf.2022.07.002

515

516

Table 1. Distribution of study participants by sociodemographic characteristics

|                                                          | 2019 |      | 2021 |      | P <sup>a</sup> |
|----------------------------------------------------------|------|------|------|------|----------------|
|                                                          | N    | %    | N    | %    |                |
| Total                                                    | 766  |      | 725  |      |                |
| Sex                                                      |      |      |      |      |                |
| Male                                                     | 359  | 46.9 | 365  | 50.3 | 0.195          |
| Female                                                   | 407  | 53.1 | 360  | 49.7 |                |
| Age group (year)                                         |      |      |      |      |                |
| 12                                                       | 88   | 11.5 | 78   | 10.8 | 0.571          |
| 13                                                       | 152  | 19.8 | 129  | 17.8 |                |
| 14                                                       | 122  | 15.9 | 110  | 15.2 |                |
| 15                                                       | 140  | 18.3 | 120  | 16.6 |                |
| 16                                                       | 119  | 15.5 | 133  | 18.3 |                |
| 17                                                       | 115  | 15.0 | 120  | 16.6 |                |
| 18                                                       | 30   | 3.9  | 35   | 4.8  |                |
| Residence area                                           |      |      |      |      |                |
| 21 metropolises and cities with population of 100,000+   | 679  | 88.6 | 652  | 89.9 | 0.452          |
| Cities with population < 100,000, and towns and villages | 87   | 11.4 | 73   | 10.1 |                |
| Equivalent household income (million yen)                |      |      |      |      |                |
| < 1.375                                                  | 69   | 9.0  | 66   | 9.1  | 0.347          |
| 1.375 - 2.75                                             | 259  | 33.8 | 220  | 30.3 |                |
| 2.75+                                                    | 438  | 57.2 | 439  | 60.6 |                |
| Family structure                                         |      |      |      |      |                |
| Both parents                                             | 651  | 85.0 | 635  | 87.6 | 0.153          |
| Other                                                    | 115  | 15.0 | 90   | 12.4 |                |
| Sports participation                                     |      |      |      |      |                |
| No                                                       | 270  | 35.2 | 292  | 40.3 | 0.048          |
| Yes                                                      | 496  | 64.8 | 433  | 59.7 |                |
| Self-rated health                                        |      |      |      |      |                |
| Good                                                     | 650  | 84.9 | 602  | 83.0 | 0.359          |
| Bad                                                      | 116  | 15.1 | 123  | 17.0 |                |
| Preference of physical activity                          |      |      |      |      |                |
| Dislike                                                  | 142  | 18.5 | 130  | 17.9 | 0.789          |
| Like                                                     | 624  | 81.5 | 595  | 82.1 |                |
| MVPA                                                     |      |      |      |      |                |
| < 7 days                                                 | 612  | 79.9 | 640  | 88.3 | 0.000          |
| 7 days                                                   | 154  | 20.1 | 85   | 11.7 |                |
| Screen time                                              |      |      |      |      |                |
| < 2 h                                                    | 176  | 23.0 | 108  | 14.9 | 0.000          |
| ≥ 2 h                                                    | 590  | 77.0 | 617  | 85.1 |                |
| Adequate sleep duration                                  |      |      |      |      |                |
| 8hr–10hr                                                 | 484  | 63.2 | 469  | 64.7 | 0.553          |
| Other                                                    | 282  | 36.8 | 256  | 35.3 |                |
| Breakfast                                                |      |      |      |      |                |
| Almost everyday                                          | 126  | 16.4 | 121  | 16.7 | 0.944          |
| Other                                                    | 640  | 83.6 | 604  | 83.3 |                |
| Constipation                                             |      |      |      |      |                |
| Yes                                                      | 77   | 10.1 | 76   | 10.5 | 0.798          |
| No                                                       | 689  | 89.9 | 649  | 89.5 |                |

<sup>a</sup>  $\chi^2$  test

Table 2. Prevalence of health behavior in 2019 and 2021 according to the equivalent household income

|                                           | Compliance with MVPA guideline |      |       |      |                          | Compliance with screen time guideline |      |       |      |                          | Compliance with sleep duration guideline |      |       |      |       | Daily breakfast intake |      |       |      |  |
|-------------------------------------------|--------------------------------|------|-------|------|--------------------------|---------------------------------------|------|-------|------|--------------------------|------------------------------------------|------|-------|------|-------|------------------------|------|-------|------|--|
|                                           | 2019                           |      | 2021  |      | P <sup>b</sup> for trend | 2019                                  |      | 2021  |      | P <sup>b</sup> for trend | 2019                                     |      | 2021  |      | 2019  |                        | 2021 |       |      |  |
|                                           | n                              | (%)  | n     | (%)  |                          | n                                     | (%)  | n     | (%)  |                          | n                                        | (%)  | n     | (%)  | n     | (%)                    | n    | (%)   |      |  |
| Total                                     | 154                            | 20.1 | 85    | 11.7 | 0.000                    | 176                                   | 23   | 108   | 14.9 | 0.000                    | 282                                      | 36.8 | 256   | 35.3 | 0.545 | 640                    | 83.6 | 604   | 83.3 |  |
| Equivalent household income (million yen) |                                |      |       |      |                          |                                       |      |       |      |                          |                                          |      |       |      |       |                        |      |       |      |  |
| < 1.375                                   | 15                             | 21.7 | 3     | 4.5  | 0.003                    | 14                                    | 20.3 | 9     | 13.6 | 0.304                    | 27                                       | 39.1 | 19    | 28.8 | 0.205 | 48                     | 69.6 | 50    | 75.8 |  |
| 1.375 - 2.75                              | 53                             | 20.5 | 22    | 10.0 | 0.002                    | 49                                    | 18.9 | 35    | 15.9 | 0.388                    | 95                                       | 36.7 | 84    | 38.2 | 0.735 | 208                    | 80.3 | 189   | 85.9 |  |
| 2.75+                                     | 86                             | 19.6 | 60    | 13.7 | 0.018                    | 113                                   | 25.8 | 64    | 14.6 | 0.000                    | 160                                      | 36.5 | 153   | 34.9 | 0.604 | 384                    | 87.7 | 365   | 83.1 |  |
| P for Fisher's exact test                 | 0.907                          |      | 0.063 |      |                          | 0.097                                 |      | 0.863 |      |                          | 0.916                                    |      | 0.356 |      |       | 0.000                  |      | 0.151 |      |  |

MVPA moderate-to-vigorous physical activity,

a bowel movement frequency is less than once every 3 days.

b Cochran-Armitage trend test

Table 3. Slope index of inequality (SII) and relative index of inequality (RII) in health behavior according to the income levels by survey year

|                                                 | 2019  |                 | 2021  |                 | P for trend <sup>c</sup> |
|-------------------------------------------------|-------|-----------------|-------|-----------------|--------------------------|
| <b>MVPA</b>                                     |       |                 |       |                 |                          |
| Crude SII (95% CI)                              | -2.37 | (-13.62, 8.87)  | 11.20 | (2.9, 19.5)     | 0.057                    |
| Adjusted SII <sup>a</sup> (95% CI) <sup>b</sup> | -7.94 | (-18.94, 3.06)  | 8.86  | (0.23, 17.48)   | 0.032                    |
| Crude RII                                       | 0.86  | (0.43, 1.73)    | 3.03  | (1.16, 7.93)    | 0.038                    |
| Adjusted RII <sup>a</sup> (95% CI)              | 0.59  | (0.28, 1.23)    | 2.50  | (0.95, 6.58)    | 0.018                    |
| <b>Screen time</b>                              |       |                 |       |                 |                          |
| Crude SII (95% CI)                              | 20.72 | (7.71, 33.72)   | 4.74  | (-7.97, 17.45)  | 0.085                    |
| Adjusted SII <sup>a</sup> (95% CI) <sup>b</sup> | 15.85 | (3, 28.7)       | 6.42  | (-6.19, 19.03)  | 0.137                    |
| Crude RII                                       | 2.57  | (1.4, 4.7)      | 1.27  | (0.66, 2.47)    | 0.125                    |
| Adjusted RII <sup>a</sup> (95% CI)              | 2.16  | (1.13, 4.12)    | 1.41  | (0.71, 2.82)    | 0.208                    |
| <b>Sleep duration</b>                           |       |                 |       |                 |                          |
| Crude SII (95% CI)                              | -1.84 | (-15.32, 11.64) | -0.15 | (-13.96, 13.66) | 0.864                    |
| Adjusted SII <sup>a</sup> (95% CI) <sup>b</sup> | -5.42 | (-18.68, 7.83)  | 0.40  | (-12.42, 13.23) | 0.707                    |
| Crude RII                                       | 0.92  | (0.52, 1.65)    | 0.99  | (0.54, 1.82)    | 0.865                    |
| Adjusted RII <sup>a</sup> (95% CI)              | 0.79  | (0.42, 1.46)    | 1.02  | (0.52, 1.99)    | 0.720                    |
| <b>Breakfast</b>                                |       |                 |       |                 |                          |
| Crude SII (95% CI)                              | 20.22 | (9.4, 31.04)    | 1.35  | (-9.87, 12.57)  | 0.018                    |
| Adjusted SII <sup>a</sup> (95% CI) <sup>b</sup> | 18.98 | (8.4, 29.56)    | 1.29  | (-9.44, 12.01)  | 0.018                    |
| Crude RII                                       | 4.34  | (2.05, 9.18)    | 1.11  | (0.5, 2.47)     | 0.015                    |
| Adjusted RII <sup>a</sup> (95% CI)              | 4.19  | (1.89, 9.27)    | 1.14  | (0.5, 2.62)     | 0.022                    |
| <b>Constipation</b>                             |       |                 |       |                 |                          |
| Crude SII (95% CI)                              | -1.09 | (-9.29, 7.11)   | -0.82 | (-9.46, 7.82)   | 0.965                    |
| Adjusted SII <sup>a</sup> (95% CI) <sup>b</sup> | 2.68  | (-5.61, 10.97)  | 3.08  | (-5.44, 11.6)   | 0.865                    |
| Crude RII                                       | 0.89  | (0.36, 2.19)    | 0.92  | (0.37, 2.29)    | 0.960                    |
| Adjusted RII <sup>a</sup> (95% CI)              | 1.49  | (0.51, 4.31)    | 1.44  | (0.53, 3.89)    | 0.845                    |

SII slope index of inequality (%), RII relative index of inequality, CI confidence interval

a Adjusted for place of residence, family structure, sex, age, sports participation, self-rated health, and preference of PA.

b Generalized linear model with normal distribution and identity link function

c Wald test of the interaction term between equivalent household income (ridit score) and survey year
